# Supplementary material
Source: PubMed Central journal article supplement (PMC8679139)
Supplement: NIHMS1760297-supplement-Supporting_Information.pdf [file NIHMS1760297-supplement-Supporting_Information.pdf]

**Supplementary Information for:**

**Crystal Structure of Cysteamine Dioxygenase Reveals the Origin of  
the Large Substrate Scope of this Vital Mammalian Enzyme**

Rebeca L. Fernandez,<sup>1</sup> Laura D. Elmendorf,<sup>1</sup> Robert W. Smith,<sup>2</sup> Craig A. Bingman,<sup>2</sup> Brian G. Fox,<sup>2</sup>  
and Thomas C. Brunold<sup>1\*</sup>

*<sup>1</sup>Department of Chemistry, University of Wisconsin-Madison, Madison, Wisconsin 53706, United States*

*<sup>2</sup>Department of Biochemistry, University of Wisconsin-Madison, Madison, Wisconsin 53706, United States*

\* Corresponding author: [brunold@chem.wisc.edu](mailto:brunold@chem.wisc.edu)

**Table S1.** Data collection and refinement statistics

|                                    |                                                                      |              |
|------------------------------------|----------------------------------------------------------------------|--------------|
| Wavelength (Å)                     | 1.127                                                                |              |
| Space group                        | P 21 21 21                                                           |              |
| Unit cell                          | a=54.296 Å, b=139.525 Å, c=142.007 Å, $\alpha=\beta=\gamma=90^\circ$ |              |
| Data collection statistics         |                                                                      |              |
|                                    | overall                                                              | last shell   |
| Resolution range (Å)               | 39.17 – 1.89                                                         | 1.958 – 1.89 |
| Total reflections                  | 1144403                                                              | 108025       |
| Unique reflections                 | 86883                                                                | 4059         |
| Multiplicity                       | 13.2                                                                 | 12.6         |
| Completeness (%)                   | 87.21                                                                | 47.39        |
| Mean $I/\sigma(I)$                 | 12.34                                                                | 0.99         |
| Wilson B-factor                    | 34.34                                                                |              |
| R-merge                            | 0.1844                                                               | 1.657        |
| R-meas                             | 0.1919                                                               | 1.726        |
| R-pim                              | 0.05248                                                              | 0.4784       |
| CC(1/2)                            | 0.994                                                                | 0.474        |
| CC*                                | 0.998                                                                | 0.802        |
| Refinement statistics              |                                                                      |              |
| Reflections used in refinement     | 76076                                                                | 4059         |
| Reflections used for R-free        | 2519                                                                 | 161          |
| R-work                             | 0.1911                                                               | 0.2749       |
| R-free                             | 0.2275                                                               | 0.3125       |
| CC(work)                           | 0.954                                                                | 0.753        |
| CC(free)                           | 0.945                                                                | 0.789        |
| Number of non-hydrogen atoms       | 8168                                                                 |              |
| macromolecules                     | 7597                                                                 |              |
| ligands                            | 10                                                                   |              |
| solvent                            | 561                                                                  |              |
| Protein residues                   | 965                                                                  |              |
| RMS bonds (Å)                      | 0.01                                                                 |              |
| RMS angles (°)                     | 0.88                                                                 |              |
| Ramachandran favored (%)           | 98.09                                                                |              |
| Ramachandran allowed (%)           | 1.49                                                                 |              |
| Ramachandran outliers (%)          | 0.42                                                                 |              |
| Rotamer outliers (%)               | 0.36                                                                 |              |
| Clashscore                         | 1.79                                                                 |              |
| Average B-factor (Å <sup>2</sup> ) | 46.47                                                                |              |
| Macromolecules (Å <sup>2</sup> )   | 46.74                                                                |              |
| Ligands (Å <sup>2</sup> )          | 42.78                                                                |              |
| Solvent (Å <sup>2</sup> )          | 42.91                                                                |              |
| Number of TLS groups               | 16                                                                   |              |

**Table S2.** Results from a SuperPose analysis for the four different ADO monomers in the unit cell. <http://superpose.wishartlab.com>

Maiti R, Van Domselaar GH, Zhang H, Wishart DS. SuperPose: a simple server for sophisticated structural superposition. Nucleic Acids Res. 2004 Jul 1;32(Web Server issue):W590-4. doi: 10.1093/nar/gkh477. PMID: 15215457; PMCID: PMC441615.

### Chains A and B

Global RMSD

|              | <u>Alpha Carbons</u> | <u>Back Bone</u> | <u>Heavy</u>          | <u>All</u> |
|--------------|----------------------|------------------|-----------------------|------------|
| <u>RMSD</u>  | 1.30                 | 1.31             | 1.72                  | 1.90       |
| <u>Atoms</u> | 236                  | 944              | 1859                  | 3697       |
|              | <u>Structure</u>     |                  | <u>Residues</u>       |            |
|              | PDBA chain 'A'       |                  | 7-22, 31-217, 224-256 |            |
|              | PDBB chain 'B'       |                  | 7-22, 31-217, 224-256 |            |

### Chains A and C

Global RMSD

|              | <u>Alpha Carbons</u> | <u>Back Bone</u> | <u>Heavy</u>                 | <u>All</u> |
|--------------|----------------------|------------------|------------------------------|------------|
| <u>RMSD</u>  | 1.19                 | 1.18             | 1.43                         | 1.60       |
| <u>Atoms</u> | 236                  | 944              | 1852                         | 3679       |
|              | <u>Structure</u>     |                  | <u>Residues</u>              |            |
|              | PDBA chain 'A'       |                  | 7-21, 22-22, 31-217, 224-256 |            |
|              | PDBB chain 'C'       |                  | 7-21, 30-30, 31-217, 224-256 |            |

### Chains A and D

Global RMSD

|              | <u>Alpha Carbons</u> | <u>Back Bone</u> | <u>Heavy</u>          | <u>All</u> |
|--------------|----------------------|------------------|-----------------------|------------|
| <u>RMSD</u>  | 1.18                 | 1.21             | 1.61                  | 1.80       |
| <u>Atoms</u> | 236                  | 944              | 1859                  | 3698       |
|              | <u>Structure</u>     |                  | <u>Residues</u>       |            |
|              | PDBA chain 'A'       |                  | 7-22, 31-217, 224-256 |            |
|              | PDBB chain 'D'       |                  | 7-22, 31-217, 224-256 |            |

### Chains B and C

Global RMSD

|              | <u>Alpha Carbons</u> | <u>Back Bone</u> | <u>Heavy</u>          | <u>All</u> |
|--------------|----------------------|------------------|-----------------------|------------|
| <u>RMSD</u>  | 0.69                 | 0.70             | 1.08                  | 1.33       |
| <u>Atoms</u> | 238                  | 952              | 1862                  | 3698       |
|              | <u>Structure</u>     |                  | <u>Residues</u>       |            |
|              | PDBA chain 'B'       |                  | 7-21, 30-217, 222-256 |            |
|              | PDBB chain 'C'       |                  | 7-21, 30-217, 222-256 |            |

### Chains B and D

Global RMSD

|              | <u>Alpha Carbons</u> | <u>Back Bone</u> | <u>Heavy</u>    | <u>All</u> |
|--------------|----------------------|------------------|-----------------|------------|
| <u>RMSD</u>  | 1.70                 | 1.65             | 1.87            | 2.04       |
| <u>Atoms</u> | 243                  | 972              | 1902            | 3780       |
|              | <u>Structure</u>     |                  | <u>Residues</u> |            |
|              | PDBA chain 'B'       |                  | 7-22, 30-256    |            |
|              | PDBB chain 'D'       |                  | 7-22, 30-256    |            |

### Chains C and D

Global RMSD

|              | <u>Alpha Carbons</u> | <u>Back Bone</u> | <u>Heavy</u>          | <u>All</u> |
|--------------|----------------------|------------------|-----------------------|------------|
| <u>RMSD</u>  | 1.44                 | 1.44             | 1.63                  | 1.82       |
| <u>Atoms</u> | 238                  | 952              | 1862                  | 3700       |
|              | <u>Structure</u>     |                  | <u>Residues</u>       |            |
|              | PDBA chain 'C'       |                  | 7-21, 30-217, 222-256 |            |
|              | PDBB chain 'D'       |                  | 7-21, 30-217, 222-256 |            |

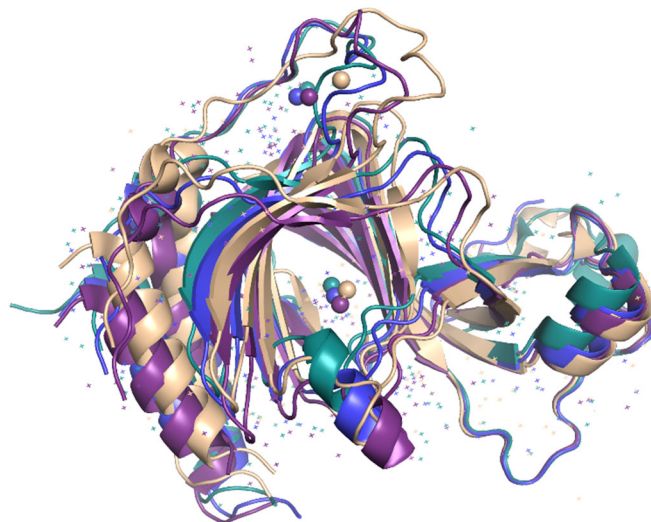

**Figure S1.** Overlay of the four independent ADO monomers in the unit cell. Chain A is shown in blue, chain B yellow, chain C green, and chain D purple. The spheres in the center of the protein are the Fe atoms and the ones near the periphery are either Cl or Mg atoms.

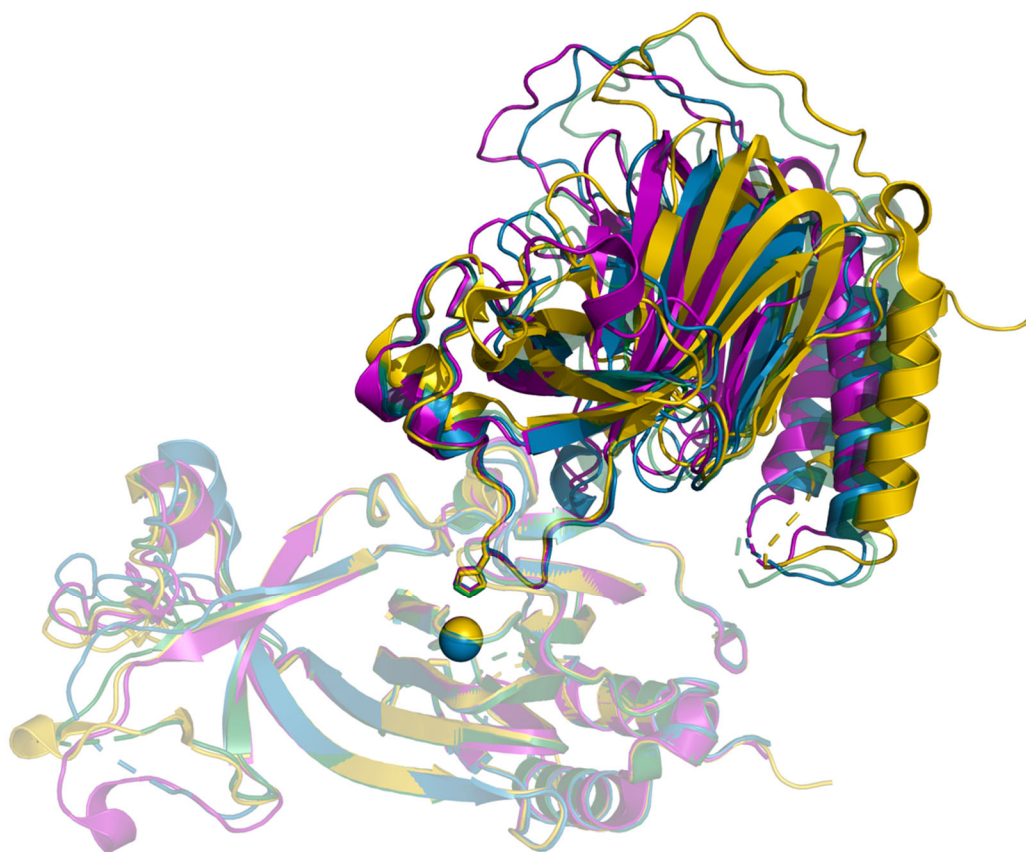

**Figure S2.** His130 from a neighboring molecule intrudes into the active site in each of the four crystallographically unique copies of *MmADO*. The four chains were superposed along with their interacting partners in the crystal. The superposed molecules are transparent, their interacting molecules are not, and His130 is rendered as sticks.

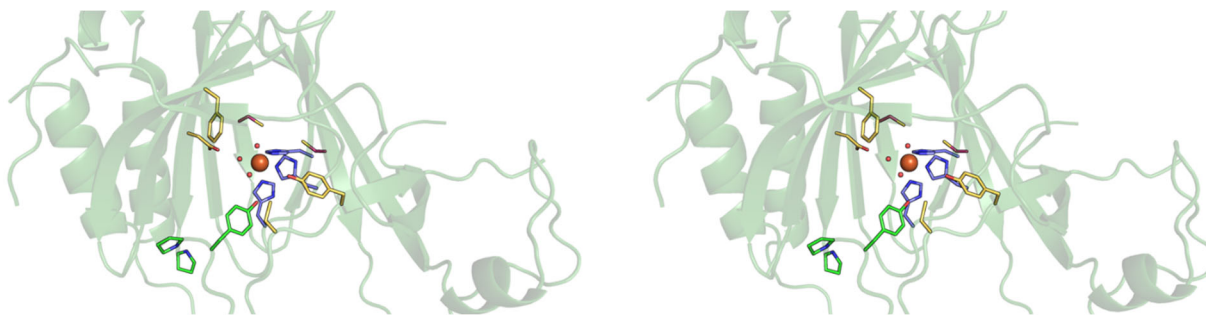

**Figure S3.** Stereo view of the active site region of *MmADO*.

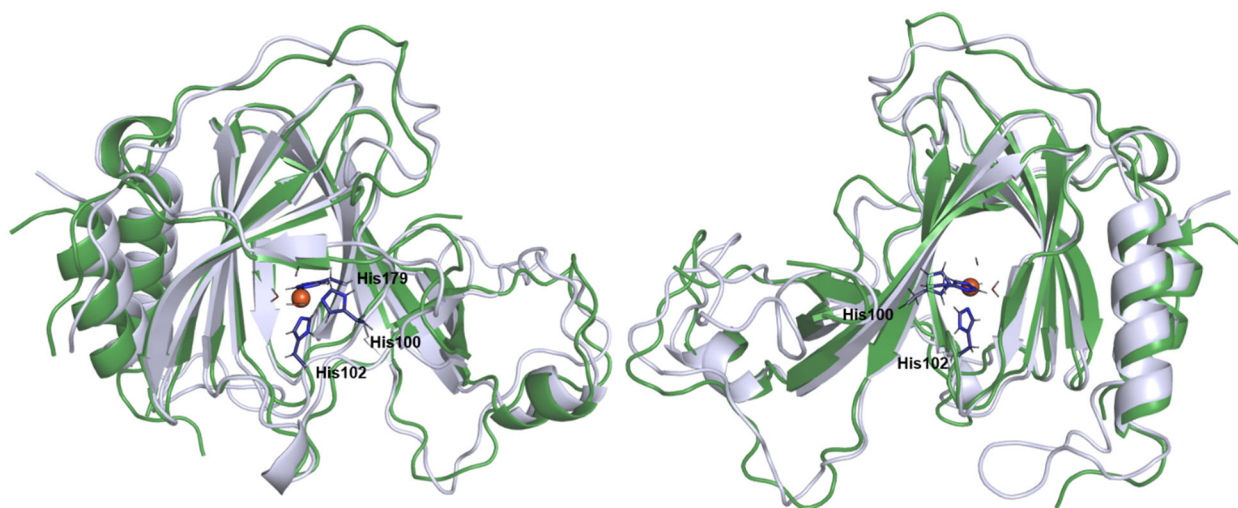

**Figure S4.** Comparison of the ADO X-ray crystal structure with a QM/MM optimized structure of ADO. The X-ray structure is shown in green and the QM/MM optimized model in gray.

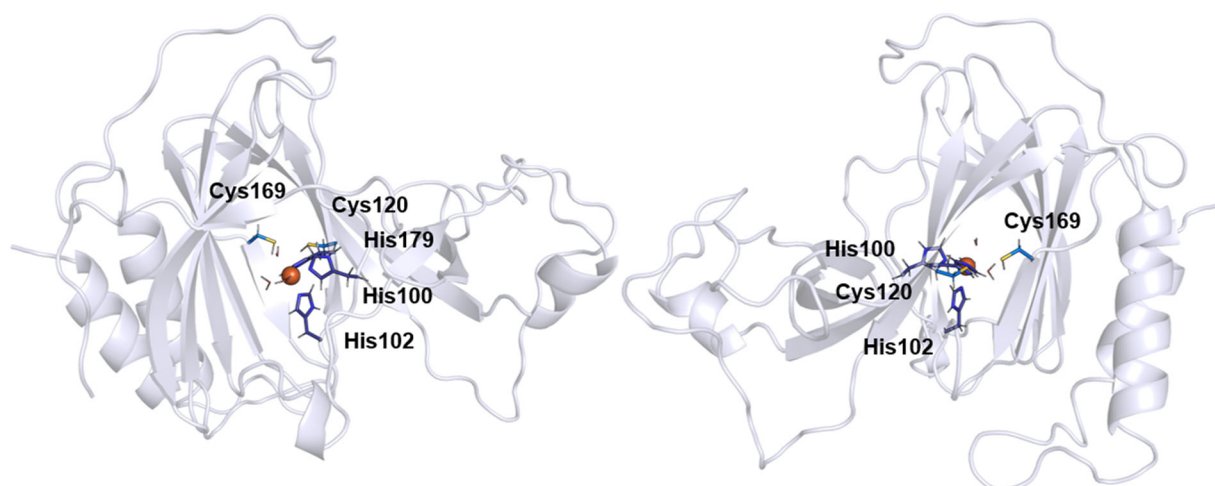

**Figure S5.** Front and back of the QM/MM optimized structure of ADO.

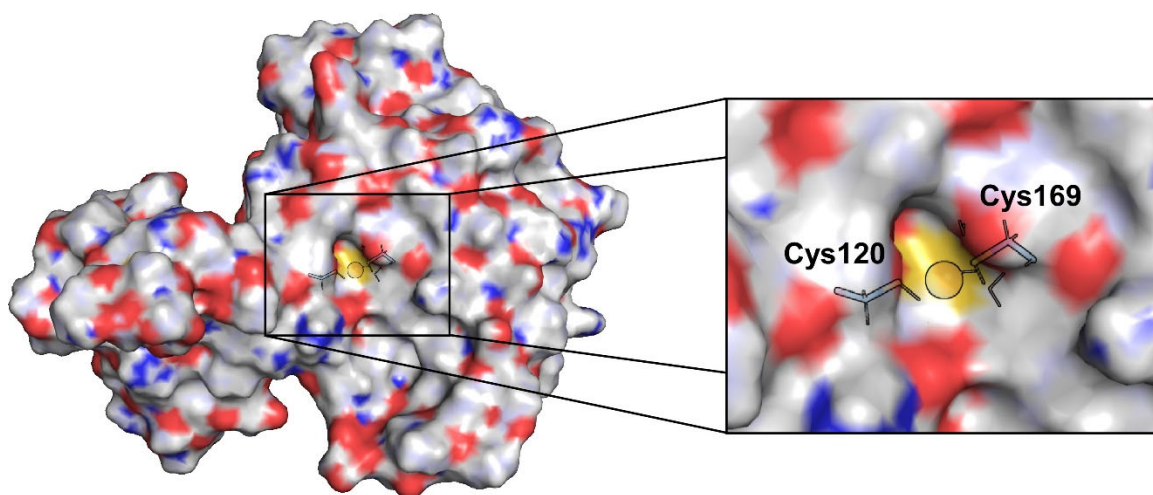

**Figure S6.** Surface representation of the backside of QM/MM optimized structure of ADO highlighting the co-substrate tunnel. The RBG coloring is as follows: Fe, orange; carbon, green; hydrogen white, oxygen, red; nitrogen, blue; and sulfur, yellow.



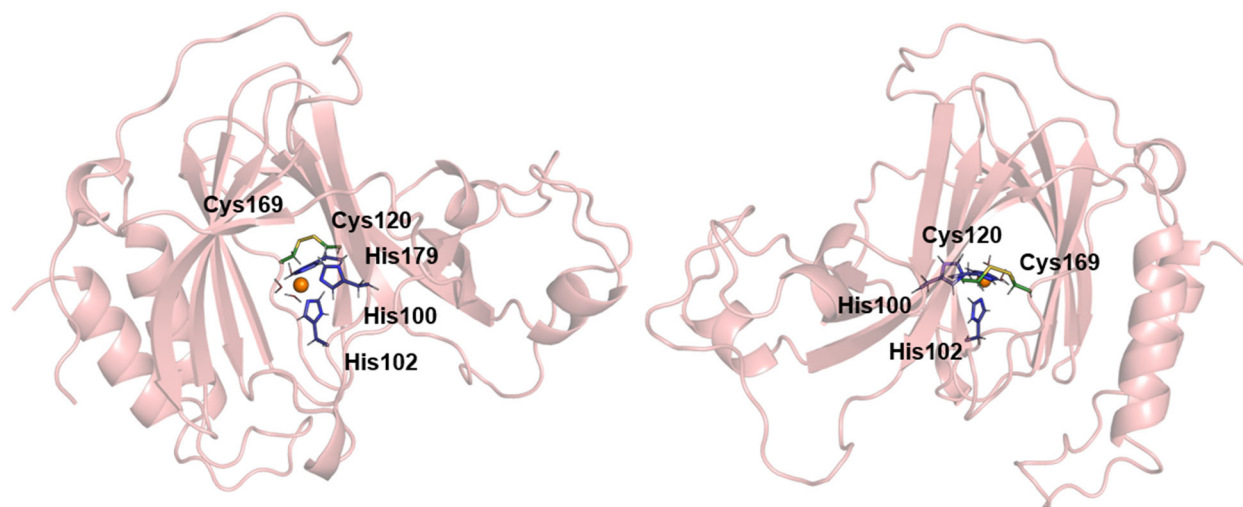

**Figure S7.** Front and back of the QM/MM optimized structure of a putative form of oxidized ADO. This structure has a disulfide bond between Cys120 and Cys169 (disulfide bond in yellow).

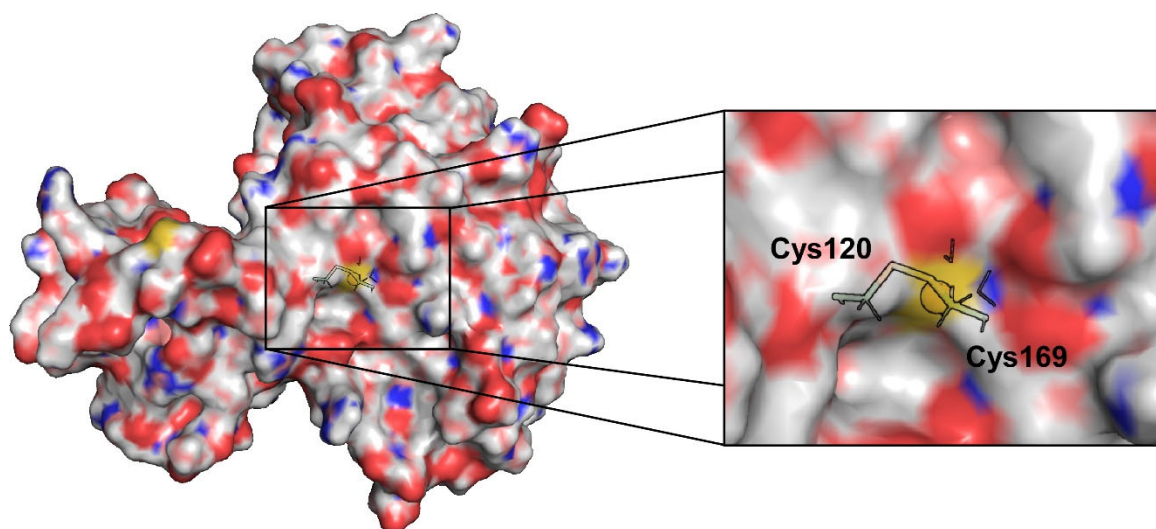

**Figure S8.** Surface representation of the backside of QM/MM optimized structure of oxidized ADO. A disulfide bond between Cys120 and Cys169 closes the back co-substrate tunnel. The RBG coloring is as follows: Fe, orange; carbon, green; hydrogen white, oxygen, red; nitrogen, blue; and sulfur, yellow.

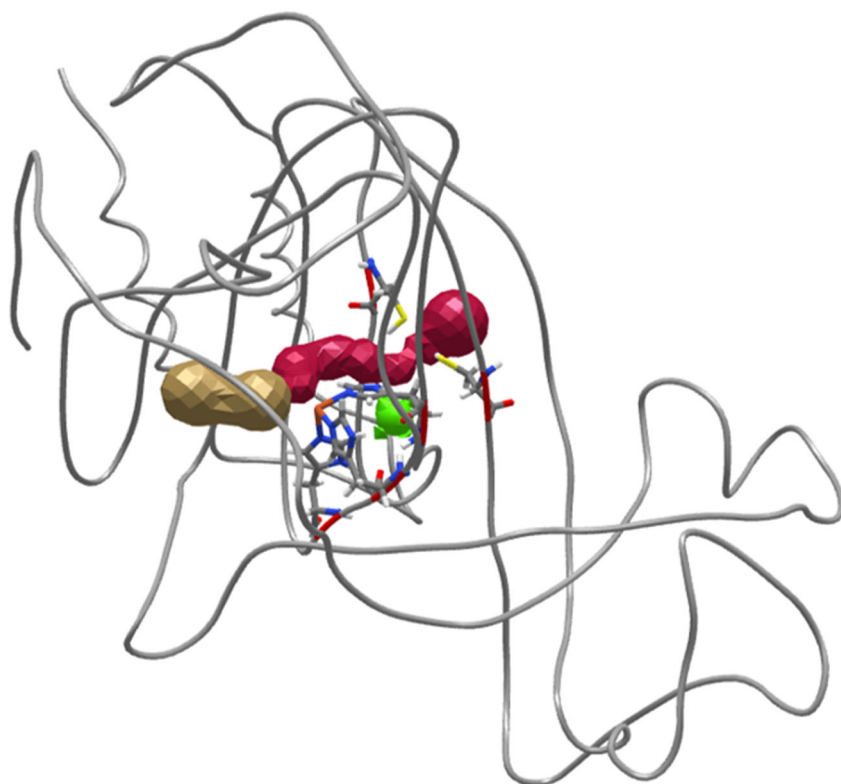

**Figure S9.** Tunnels calculated by MOLE2.5 into the active site of the QM/MM optimized model of peptide-bound ADO. To generate these tunnels the following parameters were used: internal threshold of 0.9 Å, bottleneck radius of 0.49 Å, and a cutoff ratio of 0.5.
